# Supplementary material for: Yoga compared to non-exercise or physical therapy exercise on pain, disability, and quality of life for patients with chronic low back pain: A systematic review and meta-analysis of randomized controlled trials
Source: PubMed Central journal article supplement (PMC7462307; doi:10.1371/journal.pone.0238544), 2020-09-01
Supplement: pone.0238544.s010.pdf [file pone.0238544.s010.pdf]

## Systematic review

### 1. \* Review title.

Give the working title of the review, for example the one used for obtaining funding. Ideally the title should state succinctly the interventions or exposures being reviewed and the associated health or social problems. Where appropriate, the title should use the PI(E)COS structure to contain information on the Participants, Intervention (or Exposure) and Comparison groups, the Outcomes to be measured and Study designs to be included.

Effects of yoga on pain and disability in the management of chronic low back pain : a systematic review and meta-analysis of randomized controlled trials.

### 2. Original language title.

For reviews in languages other than English, this field should be used to enter the title in the language of the review. This will be displayed together with the English language title.

### 3. \* Anticipated or actual start date.

Give the date when the systematic review commenced, or is expected to commence.  
01/11/2019

### 4. \* Anticipated completion date.

Give the date by which the review is expected to be completed.  
31/07/2020

### 5. \* Stage of review at time of this submission.

Indicate the stage of progress of the review by ticking the relevant Started and Completed boxes. Additional information may be added in the free text box provided.

Please note: Reviews that have progressed beyond the point of completing data extraction at the time of initial registration are not eligible for inclusion in PROSPERO. Should evidence of incorrect status and/or completion date being supplied at the time of submission come to light, the content of the PROSPERO record will be removed leaving only the title and named contact details and a statement that inaccuracies in the stage of the review date had been identified.

This field should be updated when any amendments are made to a published record and on completion and publication of the review. If this field was pre-populated from the initial screening questions then you are not able to edit it until the record is published.

The review has not yet started: No

| Review stage                                                    | Started | Completed |
|-----------------------------------------------------------------|---------|-----------|
| Preliminary searches                                            | Yes     | No        |
| Piloting of the study selection process                         | No      | No        |
| Formal screening of search results against eligibility criteria | No      | No        |
| Data extraction                                                 | No      | No        |
| Risk of bias (quality) assessment                               | No      | No        |
| Data analysis                                                   | No      | No        |

Provide any other relevant information about the stage of the review here (e.g. Funded proposal, protocol not yet finalised).

### 6. \* Named contact.

The named contact acts as the guarantor for the accuracy of the information presented in the register record.

Feilong Zhu

### Email salutation (e.g. "Dr Smith" or "Joanne") for correspondence:

Dr Zhu

### 7. \* Named contact email.

Give the electronic mail address of the named contact.

Zhu\_Feilong666@163.com

### 8. Named contact address

Give the full postal address for the named contact.

Xuzhou medical university

### 9. Named contact phone number.

Give the telephone number for the named contact, including international dialling code.

86-15080471559

### 10. \* Organisational affiliation of the review.

Full title of the organisational affiliations for this review and website address if available. This field may be completed as 'None' if the review is not affiliated to any organisation.

Department of Rehabilitation, Xuzhou Central Hospital

### Organisation web address:

<http://www.xzskfyy.com/>

### 11. \* Review team members and their organisational affiliations.

Give the personal details and the organisational affiliations of each member of the review team. Affiliation refers to groups or organisations to which review team members belong. **NOTE: email and country are**

## PROSPERO

### International prospective register of systematic reviews

now mandatory fields for each person.

Dr Feilong Zhu. Xuzhou medical university

Dr Wei Chen. Department of Rehabilitation, Xuzhou Central Hospital

Ming Zhang. Department of Rehabilitation, Xuzhou Central Hospital

#### 12. \* Funding sources/sponsors.

Give details of the individuals, organizations, groups or other legal entities who take responsibility for initiating, managing, sponsoring and/or financing the review. Include any unique identification numbers assigned to the review by the individuals or bodies listed.

Department of Rehabilitation, Xuzhou Central Hospital

#### Grant number(s)

#### 13. \* Conflicts of interest.

List any conditions that could lead to actual or perceived undue influence on judgements concerning the main topic investigated in the review.

None

#### 14. Collaborators.

Give the name and affiliation of any individuals or organisations who are working on the review but who are not listed as review team members. **NOTE: email and country are now mandatory fields for each person.**

#### 15. \* Review question.

State the question(s) to be addressed by the review, clearly and precisely. Review questions may be specific or broad. It may be appropriate to break very broad questions down into a series of related more specific questions. Questions may be framed or refined using PI(E)COS where relevant.

Effects of yoga on pain and disability in the management of chronic low back pain compared with standard medical care or some other interventions.

#### 16. \* Searches.

State the sources that will be searched. Give the search dates, and any restrictions (e.g. language or publication period). Do NOT enter the full search strategy (it may be provided as a link or attachment.)

English language, PubMed, Cochrane Central Register of Controlled Trials (CENTRAL), Embase

#### 17. URL to search strategy.

Give a link to a published pdf/word document detailing either the search strategy or an example of a search strategy for a specific database if available (including the keywords that will be used in the search strategies), or upload your search strategy. Do NOT provide links to your search results.

[https://www.crd.york.ac.uk/PROSPEROFILES/159865\\_STRATEGY\\_20191125.pdf](https://www.crd.york.ac.uk/PROSPEROFILES/159865_STRATEGY_20191125.pdf)

Alternatively, upload your search strategy to CRD in pdf format. Please note that by doing so you are consenting to the file being made publicly accessible.

Do not make this file publicly available until the review is complete

#### 18. \* Condition or domain being studied.

Give a short description of the disease, condition or healthcare domain being studied. This could include

## PROSPERO

### International prospective register of systematic reviews

health and wellbeing outcomes.

Chronic low back pain (CLBP) is an extremely common and often disabling musculoskeletal condition experienced by people of all ages. Chronic low back pain has a negative effect on the individuals' lives as well as on the whole society which can cause pain and dysfunction and is the main cause of inactivity and job absenteeism. In 2015, the global point prevalence of activity-limiting low back pain was 7.3%, implying that 540 million people were affected at any one time (Lancet, 2018). Currently, low back pain has been ranked as the greatest contributor to global disability and remains a costly and challenging problem for the patient and the whole society at large.

#### 19. \* Participants/population.

Give summary criteria for the participants or populations being studied by the review. The preferred format includes details of both inclusion and exclusion criteria.

~~Patients with pain in the low back and diagnosed with chronic low back pain, osteoarthritis, rheumatoid arthritis, or fractures were excluded as well as participants on low back pain related to pregnancy.~~

#### 20. \* Intervention(s), exposure(s).

Give full and clear descriptions or definitions of the nature of the interventions or the exposures to be reviewed.

Yoga was the only intervention or in combination with other treatments.

#### 21. \* Comparator(s)/control.

Where relevant, give details of the alternatives against which the main subject/topic of the review will be compared (e.g. another intervention or a non-exposed control group). The preferred format includes details of both inclusion and exclusion criteria.

~~Yoga versus general exercises or care as usual or sham treatment or low back pain education~~

Yoga versus another exercise therapy

#### 22. \* Types of study to be included.

Give details of the types of study (study designs) eligible for inclusion in the review. If there are no restrictions on the types of study design eligible for inclusion, or certain study types are excluded, this should be stated. The preferred format includes details of both inclusion and exclusion criteria.

(1) Clinical randomized controlled trials (RCTs) (2) Control group including either sham/placebo treatment or some other interventions (3) Yoga was the only intervention or in combination with other treatments

(4) studies evaluating the effects of yoga application on pain or disability in individuals with a diagnosis of chronic low back pain

#### 23. Context.

Give summary details of the setting and other relevant characteristics which help define the inclusion or exclusion criteria.

## PROSPERO

### International prospective register of systematic reviews

#### 24. \* Main outcome(s).

Give the pre-specified main (most important) outcomes of the review, including details of how the outcome is defined and measured and when these measurement are made, if these are part of the review inclusion criteria.

Disability QwEvsu Disability and Seiz (QDA) Scale, Roland Morris Disability Scale (RMDQ), JOA scores, SF-36

#### \* Measures of effect

Please specify the effect measure(s) for you main outcome(s) e.g. relative risks, odds ratios, risk difference, and/or 'number needed to treat.

Effect on disability

#### 25. \* Additional outcome(s).

List the pre-specified additional outcomes of the review, with a similar level of detail to that required for main outcomes. Where there are no additional outcomes please state 'None' or 'Not applicable' as appropriate to the review

None

#### \* Measures of effect

Please specify the effect measure(s) for you additional outcome(s) e.g. relative risks, odds ratios, risk difference, and/or 'number needed to treat.

None

#### 26. \* Data extraction (selection and coding).

Describe how studies will be selected for inclusion. State what data will be extracted or obtained. State how this will be done and recorded.

A pair of researchers independently extracted the data. Disagreements between reviewers at each stage

Original data from each study were extracted using a standard data recording form which included first

author, year of publication, country of publication, publication type, clinic condition, number of participants, participant characteristics, experimental and control interventions, duration of intervention, outcome measures , final results and adverse events.

#### 27. \* Risk of bias (quality) assessment.

Describe the method of assessing risk of bias or quality assessment. State which characteristics of the studies will be assessed and any formal risk of bias tools that will be used.

The risk of bias was independently assessed by two researchers and used a consensus method when

We used the risk of bias tool developed by the Cochrane Back Review Group to assess the risk of bias of the selected RCTs. Each of the criteria was assessed "yes", "no" or "unclear", depending on the information supplied in the report.

#### 28. \* Strategy for data synthesis.

Provide details of the planned synthesis including a rationale for the methods selected. This **must not be**

## PROSPERO

### International prospective register of systematic reviews

**generic text** but should be **specific to your review** and describe how the proposed analysis will be applied to your data.

Review Manager software (RevMan 5.3) was used to conduct this meta-analysis. Statistical heterogeneity among the studies was assessed by a  $\chi^2$  test and  $I^2$  value. The heterogeneity was quantified using the  $I^2$  index, where  $I^2$  25% indicated moderate heterogeneity;  $I^2$  50% substantial heterogeneity; and  $I^2$  75% considerable heterogeneity. When the P value of this test was 0.1 and  $I^2$  value was 50%, a random effects difference (SMD) or the weighted mean difference (WMD) and the 95% confidence interval (CI) to analyze the studies.

### 29. \* Analysis of subgroups or subsets.

State any planned investigation of 'subgroups'. Be clear and specific about which type of study or participant will be included in each group or covariate investigated. State the planned analytic approach.

We will intend to stratify the included studies by the quality of studies and if yoga was in combination with other treatments.

### 30. \* Type and method of review.

Select the type of review and the review method from the lists below. Select the health area(s) of interest for your review.

#### Type of review

Cost effectiveness

No

Diagnostic

No

Epidemiologic

No

Individual patient data (IPD) meta-analysis

No

Intervention

No

Meta-analysis

Yes

Methodology

No

Narrative synthesis

No

Network meta-analysis

No

Pre-clinical

No

Prevention

No

Prognostic

No

Prospective meta-analysis (PMA)

No

**PROSPERO**  
International prospective register of systematic reviews

Review of reviews  
No

Service delivery  
No

Synthesis of qualitative studies  
No

Systematic review  
Yes

Other  
No

**Health area of the review**

Alcohol/substance misuse/abuse  
No

Blood and immune system  
No

Cancer  
No

Cardiovascular  
No

Care of the elderly  
No

Child health  
No

Complementary therapies  
No

COVID-19  
No

Crime and justice  
No

Dental  
No

Digestive system  
No

Ear, nose and throat  
No

Education  
Yes

Endocrine and metabolic disorders  
No

Eye disorders  
No

General interest  
No

Genetics  
No

Health inequalities/health equity  
No

Infections and infestations  
No

International development

**PROSPERO**  
International prospective register of systematic reviews

No

Mental health and behavioural conditions

No

Musculoskeletal

Yes

Neurological

No

Nursing

No

Obstetrics and gynaecology

No

Oral health

No

Palliative care

No

Perioperative care

No

Physiotherapy

Yes

Pregnancy and childbirth

No

Public health (including social determinants of health)

No

Rehabilitation

Yes

Respiratory disorders

No

Service delivery

No

Skin disorders

No

Social care

No

Surgery

No

Tropical Medicine

No

Urological

No

Wounds, injuries and accidents

No

Violence and abuse

No

### 31. Language.

Select each language individually to add it to the list below, use the bin icon to remove any added in error.

English

There is not an English language summary



## PROSPERO

### International prospective register of systematic reviews

#### 32. \* Country.

Select the country in which the review is being carried out from the drop down list. For multi-national collaborations select all the countries involved.

China

#### 33. Other registration details.

Give the name of any organisation where the systematic review title or protocol is registered (such as with The Campbell Collaboration, or The Joanna Briggs Institute) together with any unique identification number assigned. (N.B. Registration details for Cochrane protocols will be automatically entered). If extracted data will be stored and made available through a repository such as the Systematic Review Data Repository (SRDR), details and a link should be included here. If none, leave blank.

#### 34. Reference and/or URL for published protocol.

Give the citation and link for the published protocol, if there is one

Give the link to the published protocol.

Alternatively, upload your published protocol to CRD in pdf format. Please note that by doing so you are consenting to the file being made publicly accessible.

Yes I give permission for this file to be made publicly available

Please note that the information required in the PROSPERO registration form must be completed in full even if access to a protocol is given.

#### 35. Dissemination plans.

Give brief details of plans for communicating essential messages from the review to the appropriate audiences.

#### Do you intend to publish the review on completion?

Yes

#### 36. Keywords.

Give words or phrases that best describe the review. Separate keywords with a semicolon or new line. Keywords will help users find the review in the Register (the words do not appear in the public record but are included in searches). Be as specific and precise as possible. Avoid acronyms and abbreviations unless these are in wide use.

#### 37. Details of any existing review of the same topic by the same authors.

Give details of earlier versions of the systematic review if an update of an existing review is being registered, including full bibliographic reference if possible.

#### 38. \* Current review status.

Review status should be updated when the review is completed and when it is published. For newregistrations the review must be Ongoing.

Please provide anticipated publication date

Review\_Ongoing

#### 39. Any additional information.

Provide any other information the review team feel is relevant to the registration of the review.

**40. Details of final report/publication(s).**

This field should be left empty until details of the completed review are available.

Give the link to the published review.
